# Supplementary material for: Creation and Validation of a Survival Nomogram Based on Immune-Nutritional Indexes for Colorectal Cancer Patients
Source: Hindawi journal article supplement (doi:10.1155/2022/1854812), 2022-03-25
Supplement: f1 [file 1854812.f1.pdf]

**Table S1. The differences of basic features between test set and validation set**

| Clinical features | Test set (n=717) | Validation set (n=307) | X <sup>2</sup> /t value | P value |
|-------------------|------------------|------------------------|-------------------------|---------|
| Sex               |                  |                        | 0.1294                  | 0.7190  |
| Male              | 436(60.81%)      | 183(59.61%)            |                         |         |
| Female            | 281(39.19%)      | 124(40.39%)            |                         |         |
| Age               |                  |                        | 0.3681                  | 0.5441  |
| <65               | 486(67.78%)      | 214(69.71%)            |                         |         |
| ≥65               | 231(32.22%)      | 93(30.29%)             |                         |         |
| BMI               |                  |                        | 0.6502                  | 0.7225  |
| ≤18               | 30(4.2%)         | 13(4.25%)              |                         |         |
| 18-24             | 447(62.52%)      | 199(65.03%)            |                         |         |
| ≥24               | 238(33.29%)      | 94(30.72%)             |                         |         |
| Differentiation   |                  |                        | 0.2647                  | 0.8760  |
| Low               | 114(15.90%)      | 45(14.66%)             |                         |         |
| Moderate          | 551(76.85%)      | 240(78.18%)            |                         |         |
| High              | 52(7.25%)        | 22(7.17%)              |                         |         |
| TNM stage         |                  |                        | 4.5908                  | 0.2043  |
| I                 | 110(15.34%)      | 38(12.38%)             |                         |         |
| II                | 259(36.12%)      | 98(31.92%)             |                         |         |
| III               | 275(38.35%)      | 136(44.30%)            |                         |         |
| IV                | 73(10.18%)       | 35(11.40%)             |                         |         |
| T_stage           |                  |                        | 1.8404                  | 0.6062  |
| T1                | 52(7.25%)        | 23(7.49%)              |                         |         |
| T2                | 130(18.13%)      | 45(14.66%)             |                         |         |
| T3                | 389(54.25%)      | 173(56.35%)            |                         |         |
| T4                | 146(20.36%)      | 66(21.50%)             |                         |         |
| N_stage           |                  |                        | 2.5057                  | 0.2857  |
| N0                | 419(58.44%)      | 163(53.09%)            |                         |         |
| N1                | 183(25.52%)      | 88(28.66%)             |                         |         |
| N2                | 115(16.04%)      | 56(18.24%)             |                         |         |
| Location          |                  |                        | 3.0696                  | 0.2155  |
| Right             | 197(27.48%)      | 101(32.90%)            |                         |         |
| Left              | 145(20.22%)      | 58(18.89%)             |                         |         |
| Rectum            | 375(52.30%)      | 148(48.21%)            |                         |         |
| Size              |                  |                        | 0.1693                  | 0.6807  |
| <5 cm             | 472(65.83%)      | 198(64.50%)            |                         |         |
| ≥5cm              | 245(34.17%)      | 109(35.50%)            |                         |         |
| Chemotherapy      |                  |                        | 0.2704                  | 0.6031  |
| No                | 342(47.70%)      | 141(45.93%)            |                         |         |
| Yes               | 375(52.30%)      | 166(54.07%)            |                         |         |
| PLT               | 235.3±85.305     | 235.4±89.1981          | -0.03                   | 0.9782  |
| MON               | 0.4535 ± 0.1768  | 0.4519±0.2019          | 0.12                    | 0.9051  |

---

|      |                 |                 |       |        |
|------|-----------------|-----------------|-------|--------|
| LYM  | 1.5569±0.9144   | 1.5305±0.5631   | 0.56  | 0.5738 |
| NEU  | 4.1885±2.1157   | 4.2285±2.4830   | -0.25 | 0.8054 |
| ALB  | 40.09±4.7924    | 39.9629±4.9417  | 0.4   | 0.6911 |
| ALP  | 78.5258±26.4184 | 78.4072±27.3122 | 0.07  | 0.9480 |
| PA   | 0.2032±0.0609   | 0.1985±0.0621   | 1.13  | 0.2584 |
| LDH  | 189.5±71.236    | 188.7±43.0716   | 0.19  | 0.8479 |
| GGT  | 28.3668±32.8259 | 26.5277±30.8674 | 0.84  | 0.4033 |
| CREA | 71.4654±20.7272 | 71.1236±17.7893 | 0.27  | 0.7895 |

---

**Table S2. Univariate Cox regression of survival outcomes of CRC patients in the test cohort.**

| Clinical factor | Overall survival    |          | Disease-free survival |          |
|-----------------|---------------------|----------|-----------------------|----------|
|                 | HR&95%CI            | P value  | HR&95%CI              | P value  |
| Gender          | 0.96 ( 0.67 - 1.4 ) | 0.82     | 0.86 ( 0.6 - 1.2 )    | 0.43     |
| Age             | 0.98 ( 0.67 - 1.4 ) | 0.92     | 1.2 ( 0.83 - 1.7 )    | 0.33     |
| BMI             | 0.6 ( 0.43 - 0.84 ) | 0.0027   | 0.83 ( 0.6 - 1.1 )    | 0.25     |
| Differentiation | 0.82 ( 0.57 - 1.2 ) | 0.28     | 1.1 ( 0.73 - 1.5 )    | 0.78     |
| TNM stage       | 3.1 ( 2.1 - 4.6 )   | 2.30E-08 | 4.4 ( 2.9 - 6.7 )     | 1.30E-11 |
| T_phase         | 3.9 ( 2.1 - 7.3 )   | 1.60E-05 | 4 ( 2.2 - 7.5 )       | 9.80E-06 |
| N_phase         | 2 ( 1.7 - 2.5 )     | 4.50E-11 | 2 ( 1.6 - 2.4 )       | 4.50E-10 |
| Tumor location  | 0.83 ( 0.68 - 1 )   | 0.07     | 0.93 ( 0.76 - 1.1 )   | 0.45     |
| Tumor size      | 1.6 ( 1.1 - 2.2 )   | 0.014    | 1.1 ( 0.77 - 1.6 )    | 0.56     |
| Chemotherapy    | 0.56 ( 0.39-0.81 )  | 0.002    | 0.95 ( 0.67 - 1.4 )   | 0.77     |
| LDH_PA          | 3.7 ( 2.5 - 5.4 )   | 5.70E-11 | 2.8 ( 1.9 - 4.1 )     | 2.40E-07 |
| LDH_ALB         | 4.5 ( 3 - 6.8 )     | 6.80E-13 | 3.8 ( 2.5 - 5.7 )     | 4.20E-10 |
| GGT_PA          | 2.7 ( 1.8 - 3.9 )   | 4.40E-07 | 2.2 ( 1.5 - 3.3 )     | 5.50E-05 |
| GGT_ALB         | 2.6 ( 1.7 - 3.9 )   | 3.80E-06 | 2.6 ( 1.8 - 3.9 )     | 2.30E-06 |
| ALP_PA          | 3.2 ( 2.2 - 4.6 )   | 1.60E-10 | 2.4 ( 1.7 - 3.5 )     | 1.60E-06 |
| ALP_ALB         | 2.3 ( 1.5 - 3.5 )   | 0.00014  | 1.7 ( 1.1 - 2.5 )     | 0.011    |
| PLT_PA          | 2.5 ( 1.8 - 3.6 )   | 2.70E-07 | 2 ( 1.4 - 2.9 )       | 0.00011  |
| PLT_ALB         | 2.1 ( 1.4 - 3 )     | 0.00021  | 1.7 ( 1.1 - 2.5 )     | 0.0093   |
| LYM_PA          | 1.8 ( 1.3 - 2.6 )   | 0.00095  | 1.3 ( 0.91 - 1.9 )    | 0.15     |
| LYM_ALB         | 0.64 ( 0.38 - 1.1 ) | 0.085    | 0.59 ( 0.36 -0.96 )   | 0.033    |
| NEU_PA          | 2.5 ( 1.7 - 3.5 )   | 6.10E-07 | 2.3 ( 1.6 - 3.3 )     | 3.40E-06 |
| NEU_ALB         | 2 ( 1.4 - 2.8 )     | 0.00018  | 1.8 ( 1.3 - 2.6 )     | 0.00091  |
| ALB_CREA        | 0.5 ( 0.32 - 0.78 ) | 0.0023   | 0.57 ( 0.36 - 0.9 )   | 0.017    |
| PA_CREA         | 0.32 ( 0.21- 0.49 ) | 8.50E-08 | 0.46 ( 0.29-0.72 )    | 0.00063  |
| MON_PA          | 3 ( 2 - 4.6 )       | 2.80E-07 | 2.7 ( 1.8 - 4.2 )     | 3.90E-06 |
| MON_ALB         | 3.4 ( 2.3 - 5.2 )   | 4.60E-09 | 3.1 ( 2.1 - 4.7 )     | 8.70E-08 |
| GRIM_Score      | 3.1 ( 1.9 - 5.3 )   | 1.80E-05 | 2.6 ( 1.5 - 4.5 )     | 0.00043  |
| PNI             | 0.31 ( 0.22- 0.45 ) | 3.10E-10 | 0.44 ( 0.3 - 0.65 )   | 2.50E-05 |
| CONUT_score     | 1.7 ( 1.3 - 2.3 )   | 5.60E-05 | 1.6 ( 1.2 - 2 )       | 0.0012   |

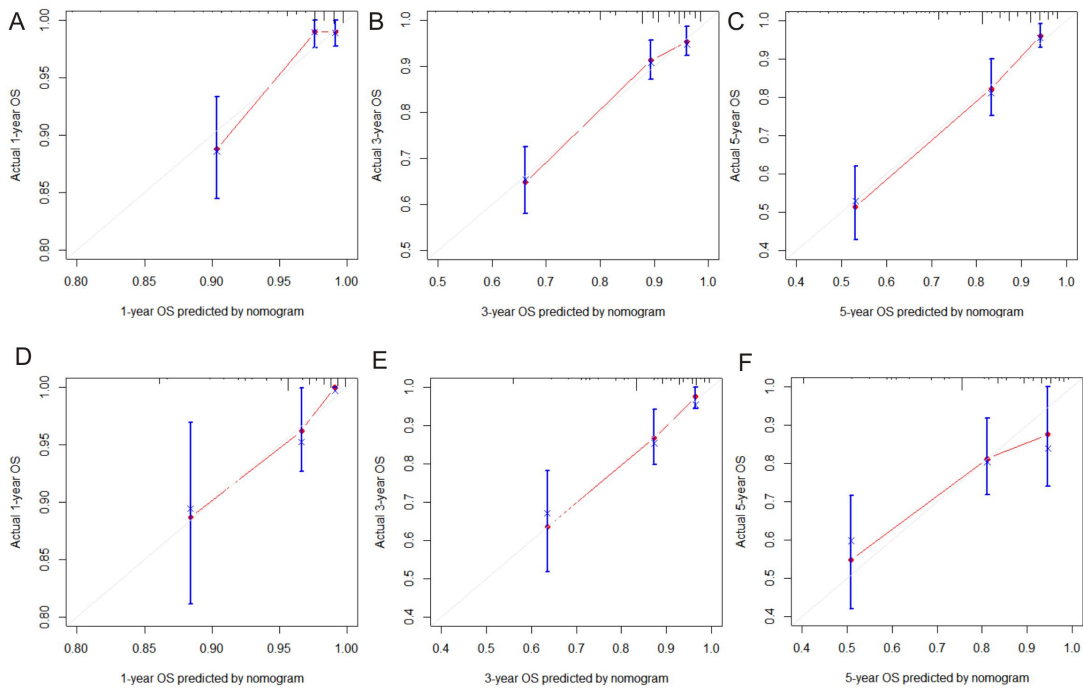

**Figure S1.** Calibration curves of OS-nomogram in the test (A-C) and validation cohorts (D-F).

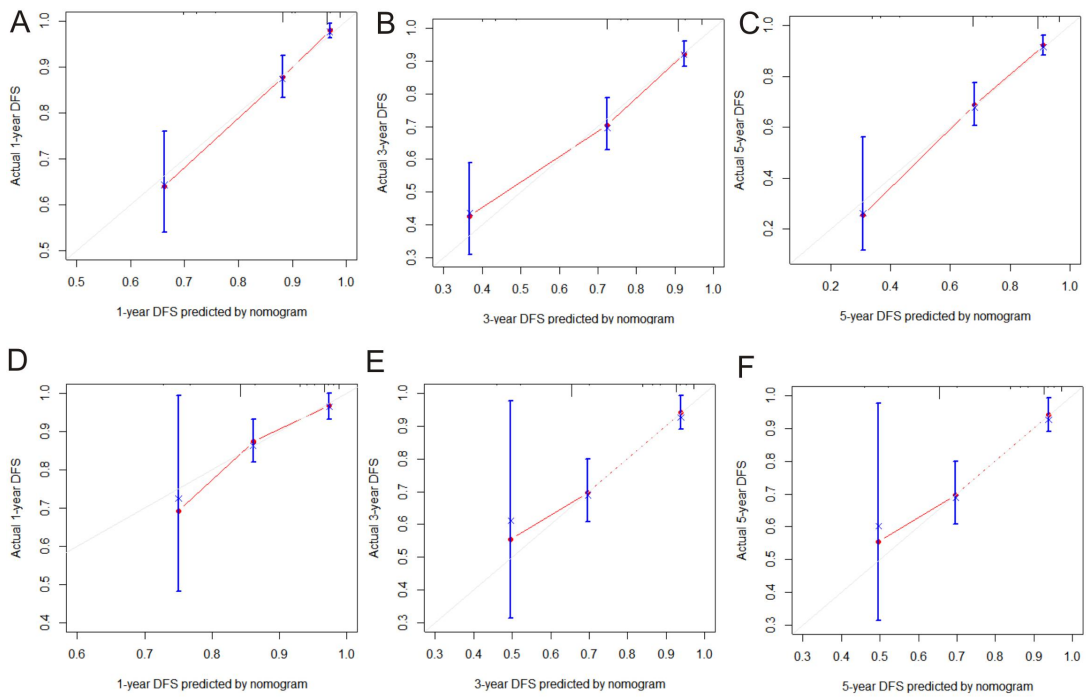

**Figure S2.** Calibration curves of DFS-nomogram in the test (A-C) and validation cohorts (D-F).
